# Supplementary material
Source: publisher site journal article supplement (https://www.dovepress.com/article/233294)
Supplement: Supplementary file 1 [file get_supplementary_file.php]

# Supporting Information

# Hypoxia-targeting multifunctional nanoparticles for sensitized chemotherapy and phototherapy in head and neck squamous cell carcinoma

Chuanhui Song1,2‡, Chuanchao Tang1,2‡, Wenguang Xu2, Jianchuan Ran1,2, Zheng Wei1,3, Yufeng Wang1,2, Huihui Zou1,2, Wei Cheng4*, Yu Cai1*, Wei Han1,2*


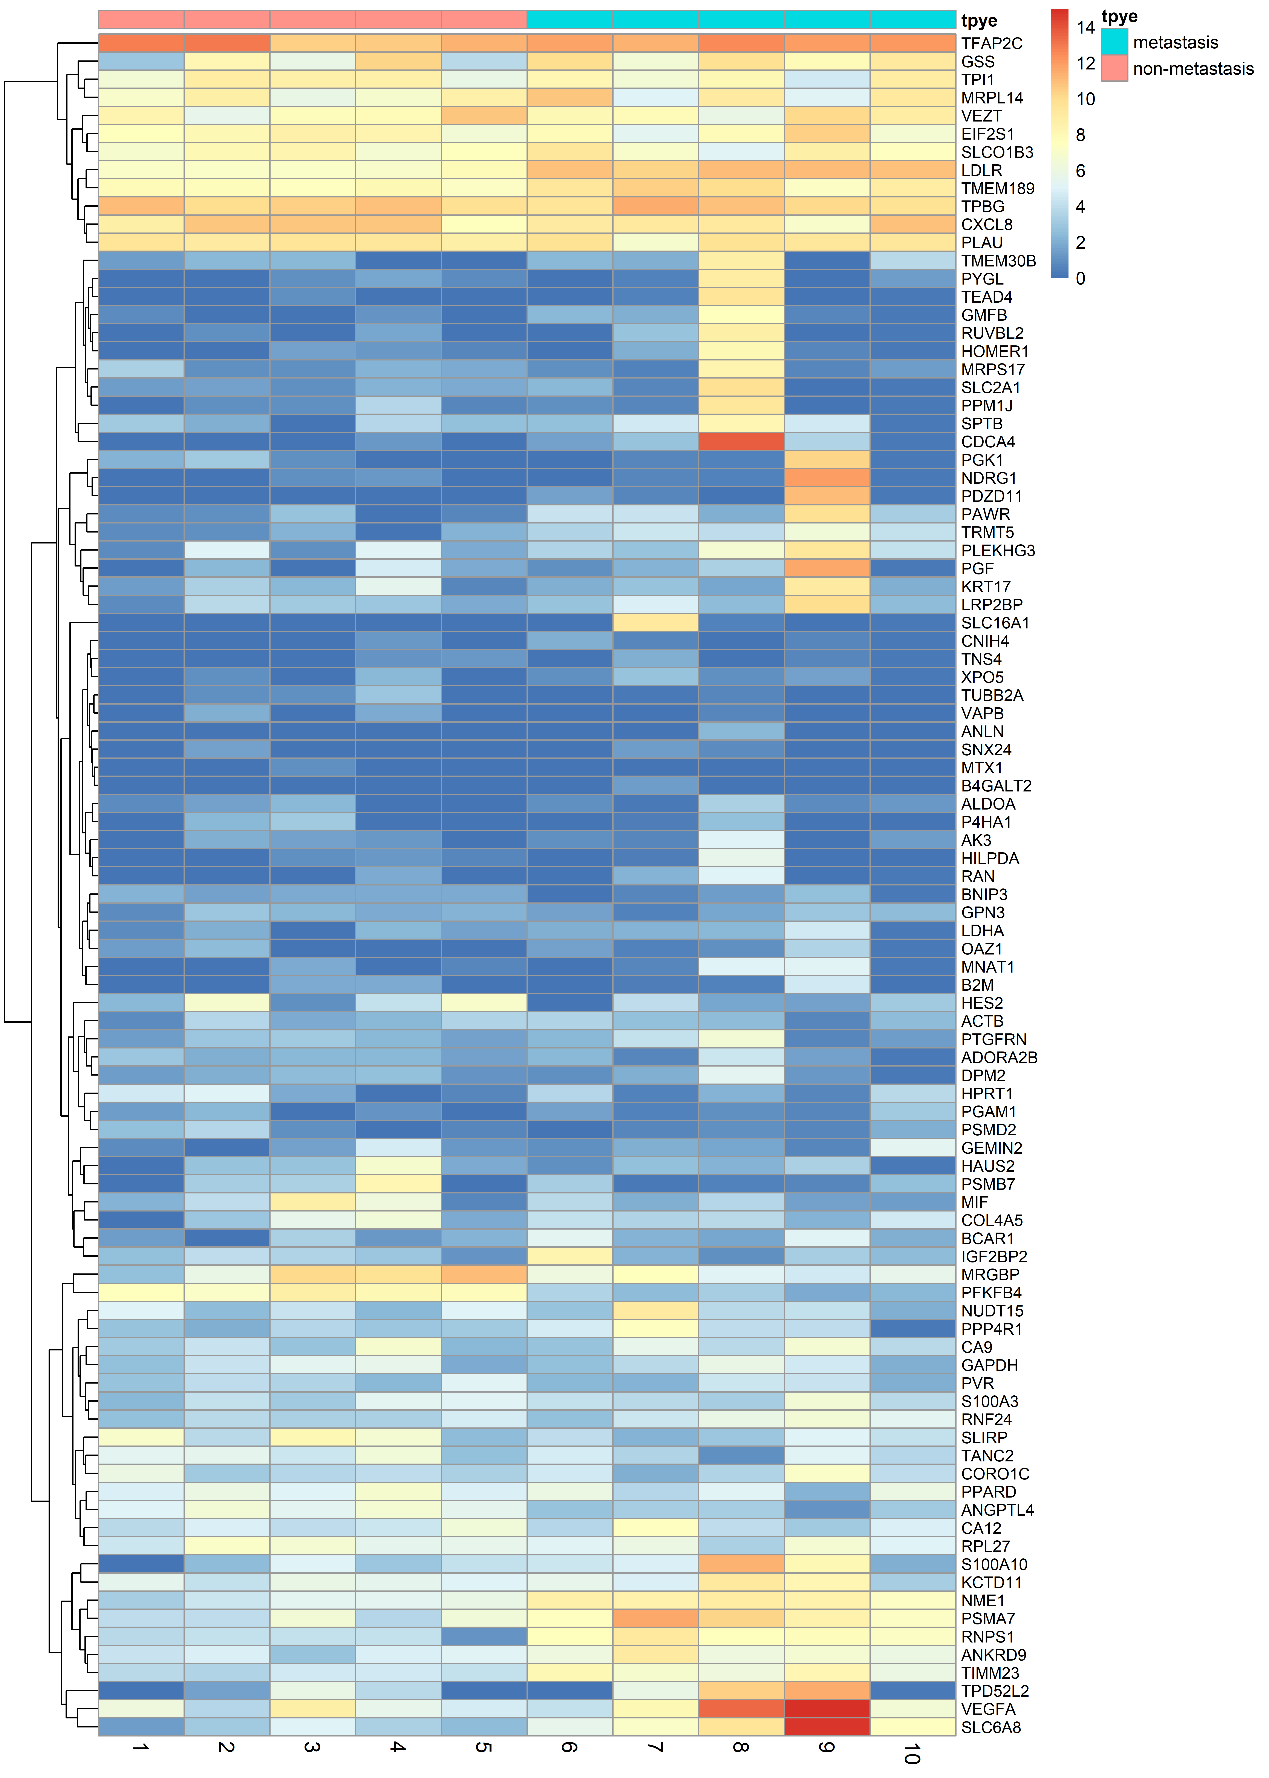


Figure S1. Heatmap of dysregulated genes from HIF-1 signaling pathways in metastatic OSCC patients by quantitative real-time PCR.


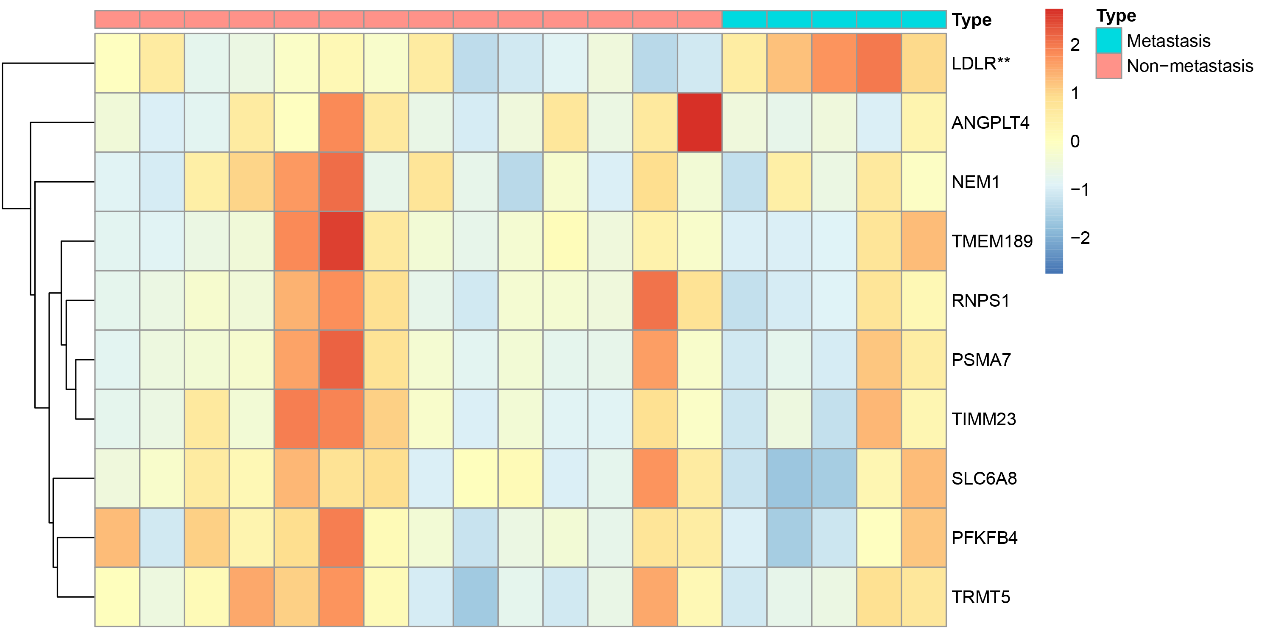
Figure S2. LDLR was identified as the only significantly dysregulated mRNA in a validation cohort of OSCC patients by quantitative real-time PCR assay.


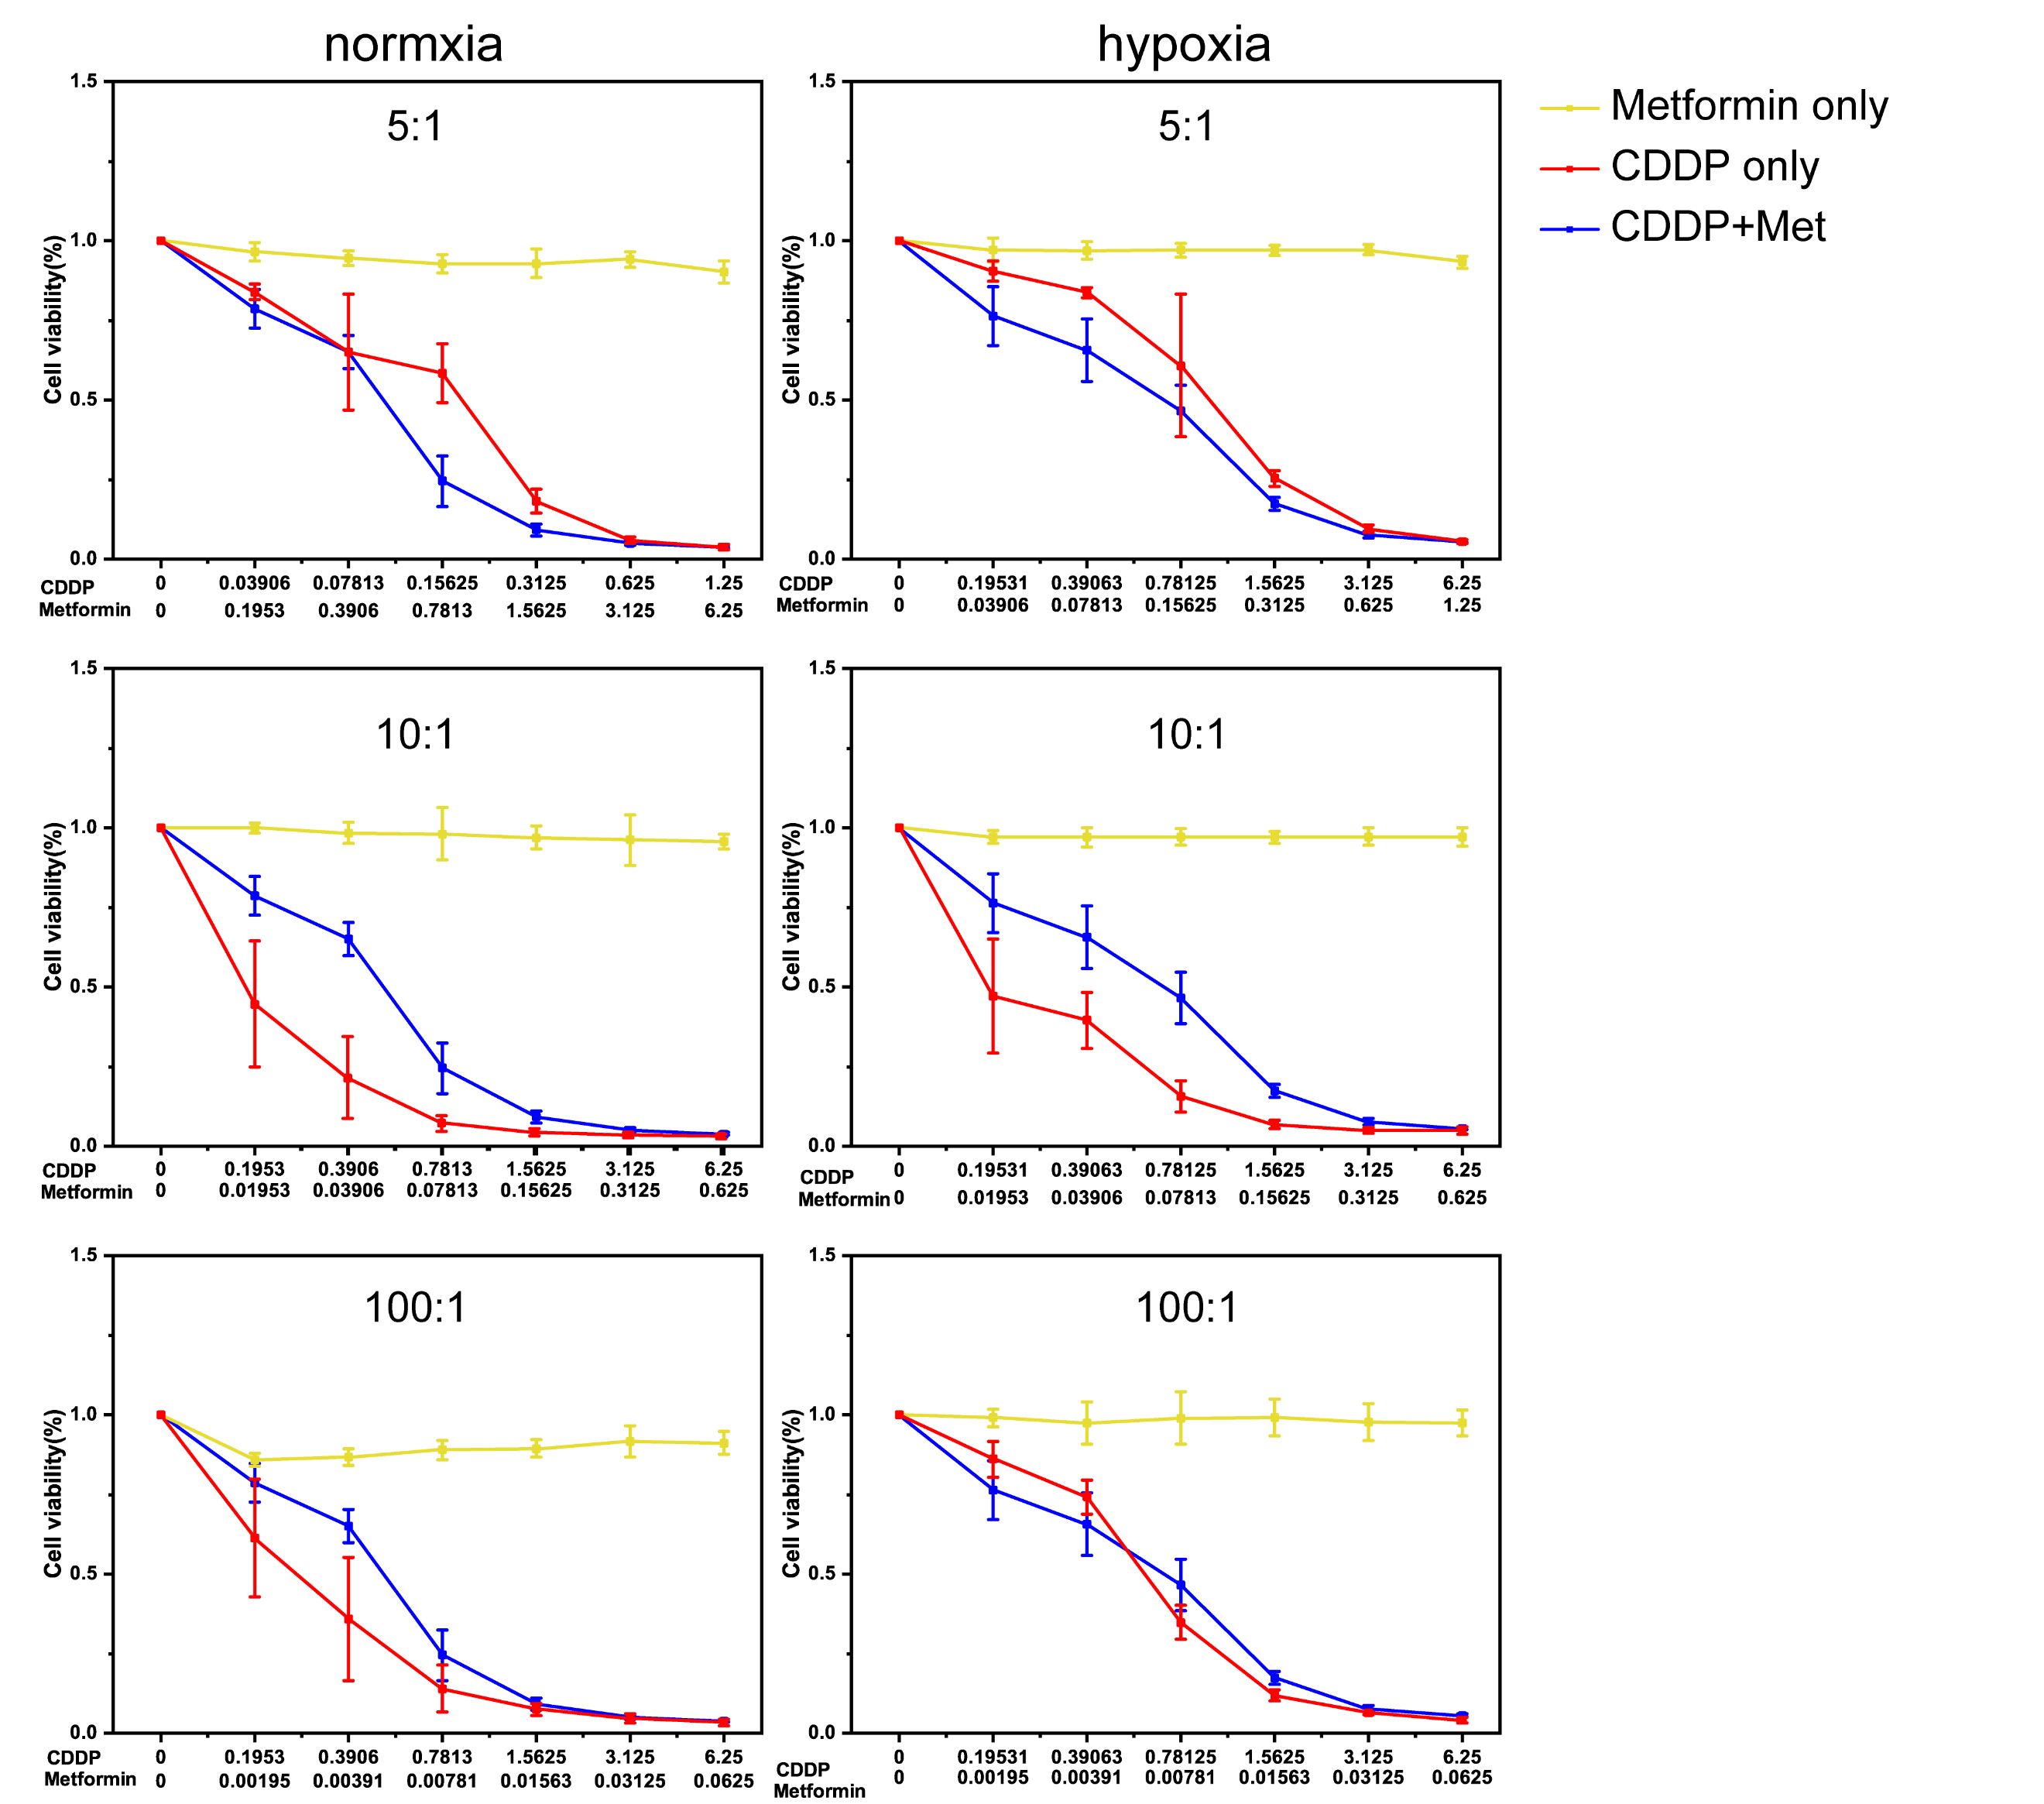


Figure S3. The origin graph of the HSC3 cells with different treatments under normoxia and hypoxia.


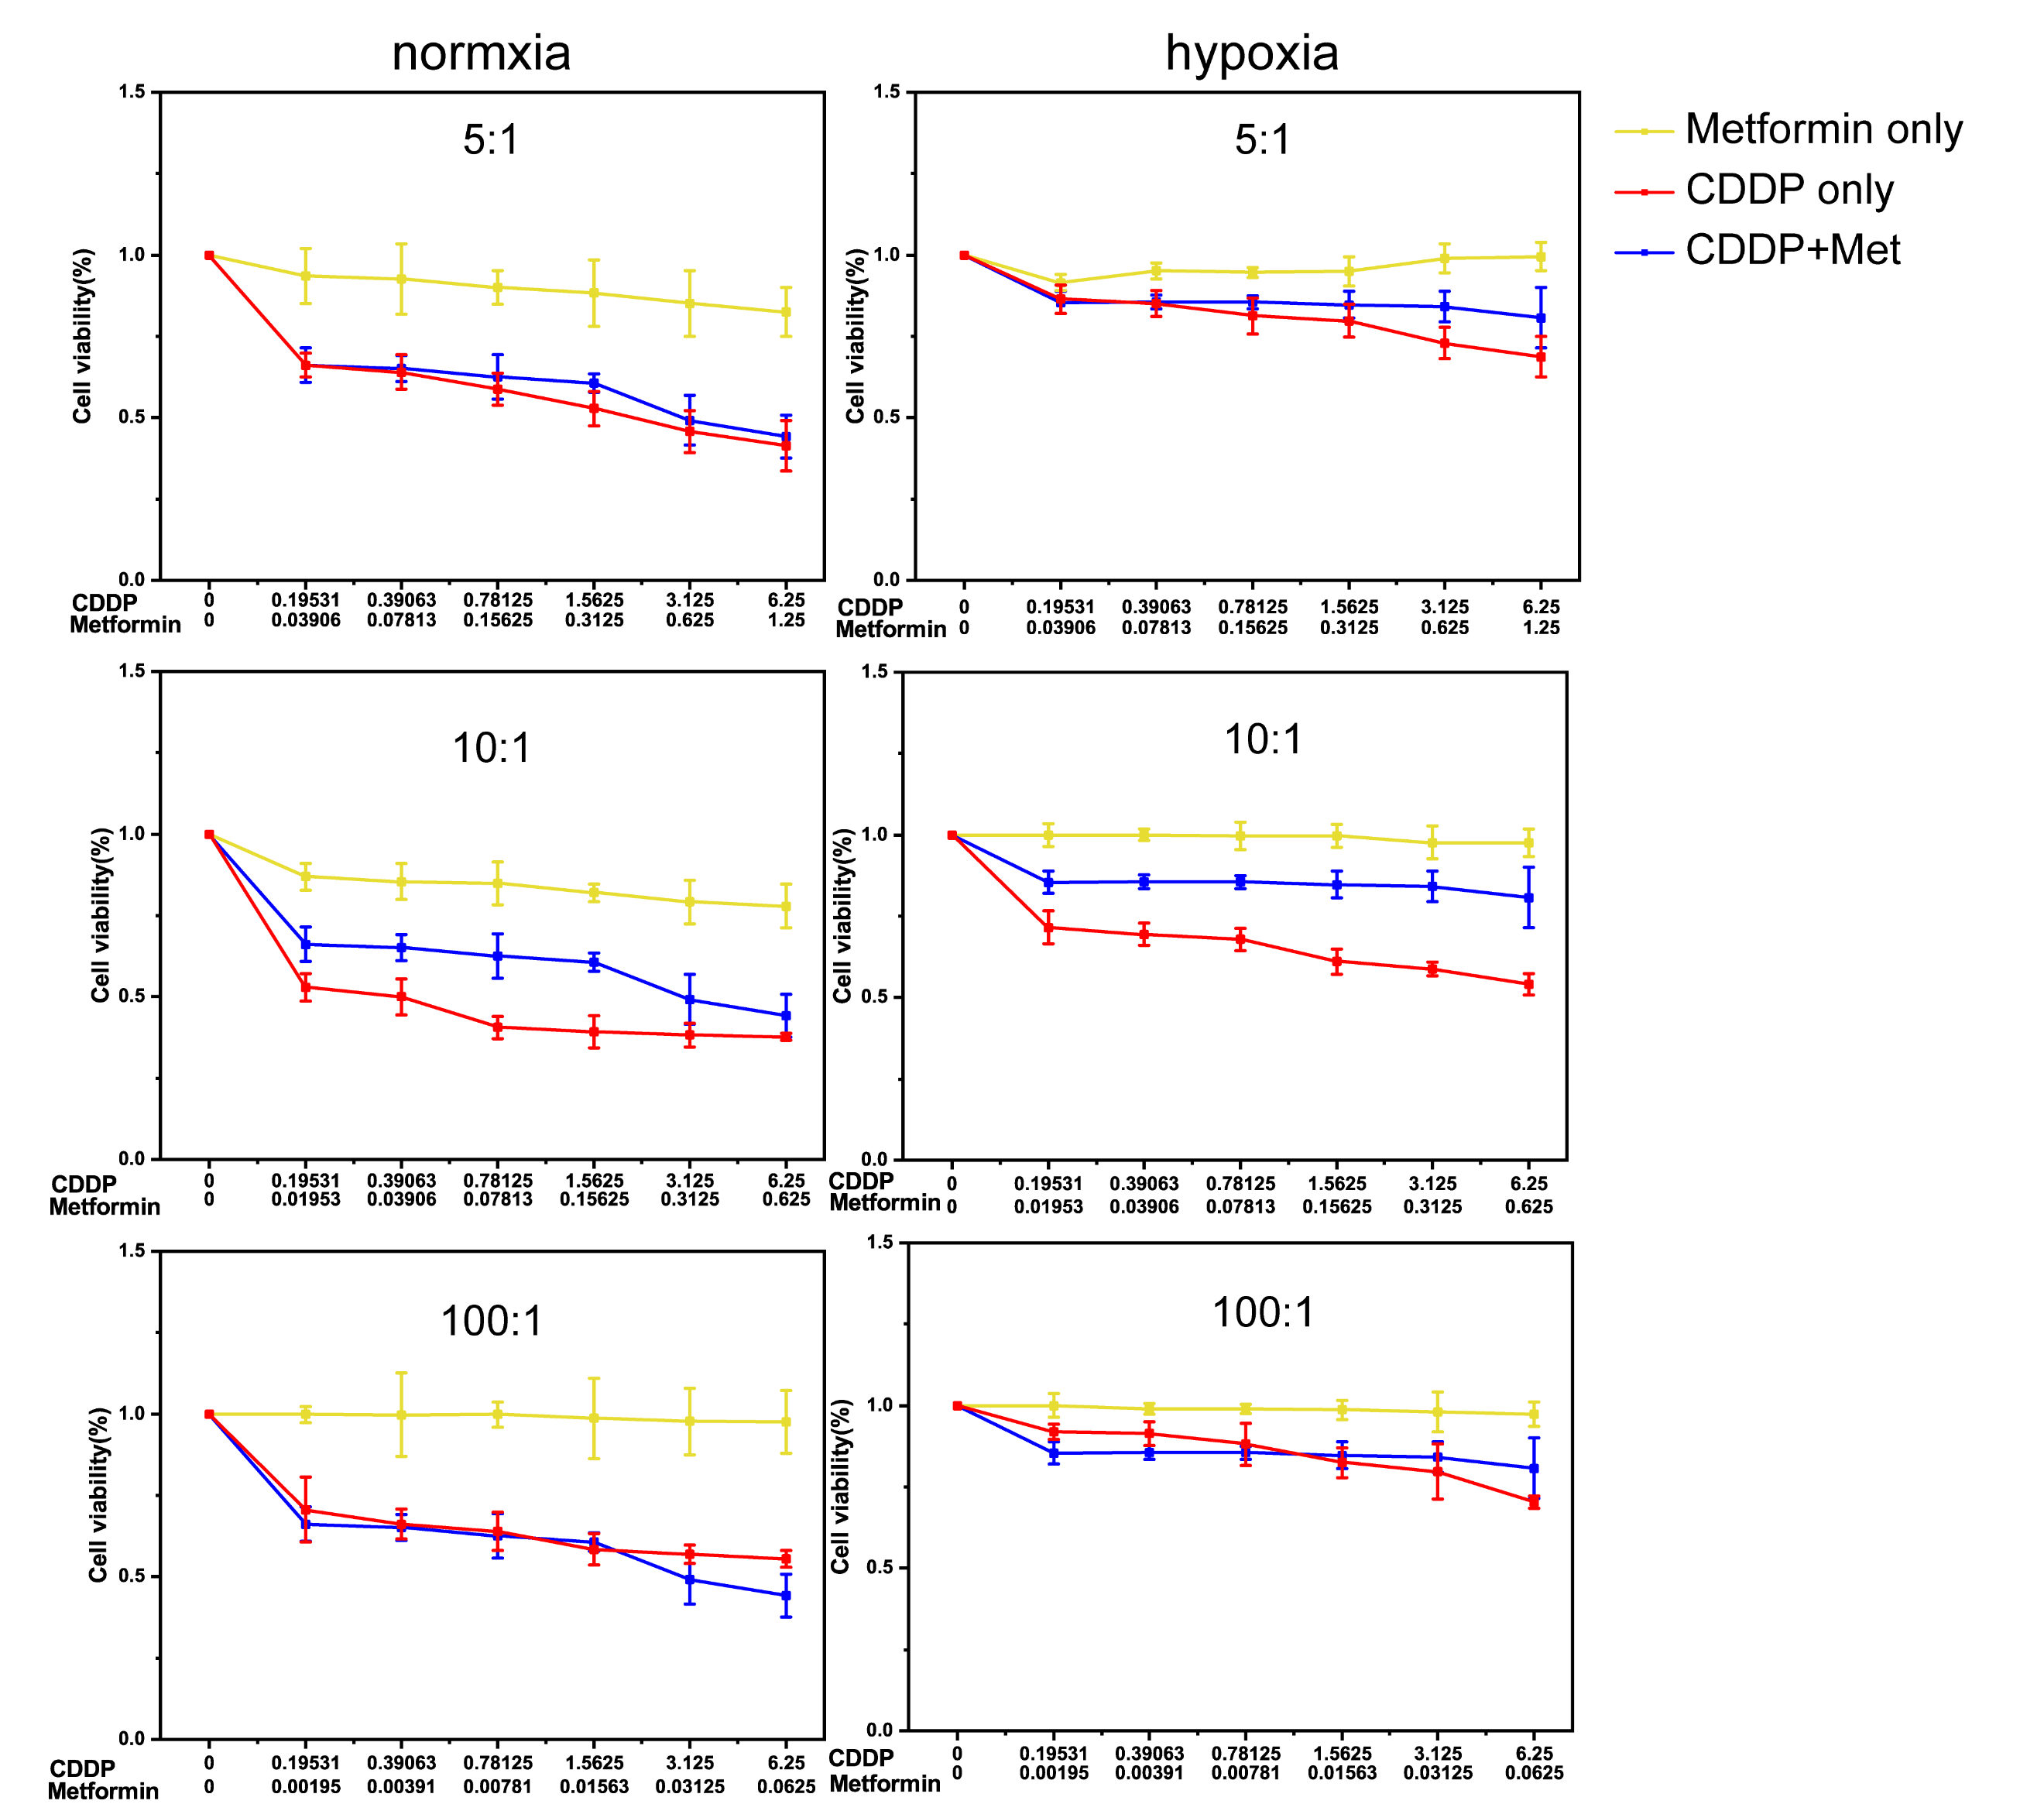


Figure S4. The origin graph of the FaDu cells with different treatments under normoxia and hypoxia.


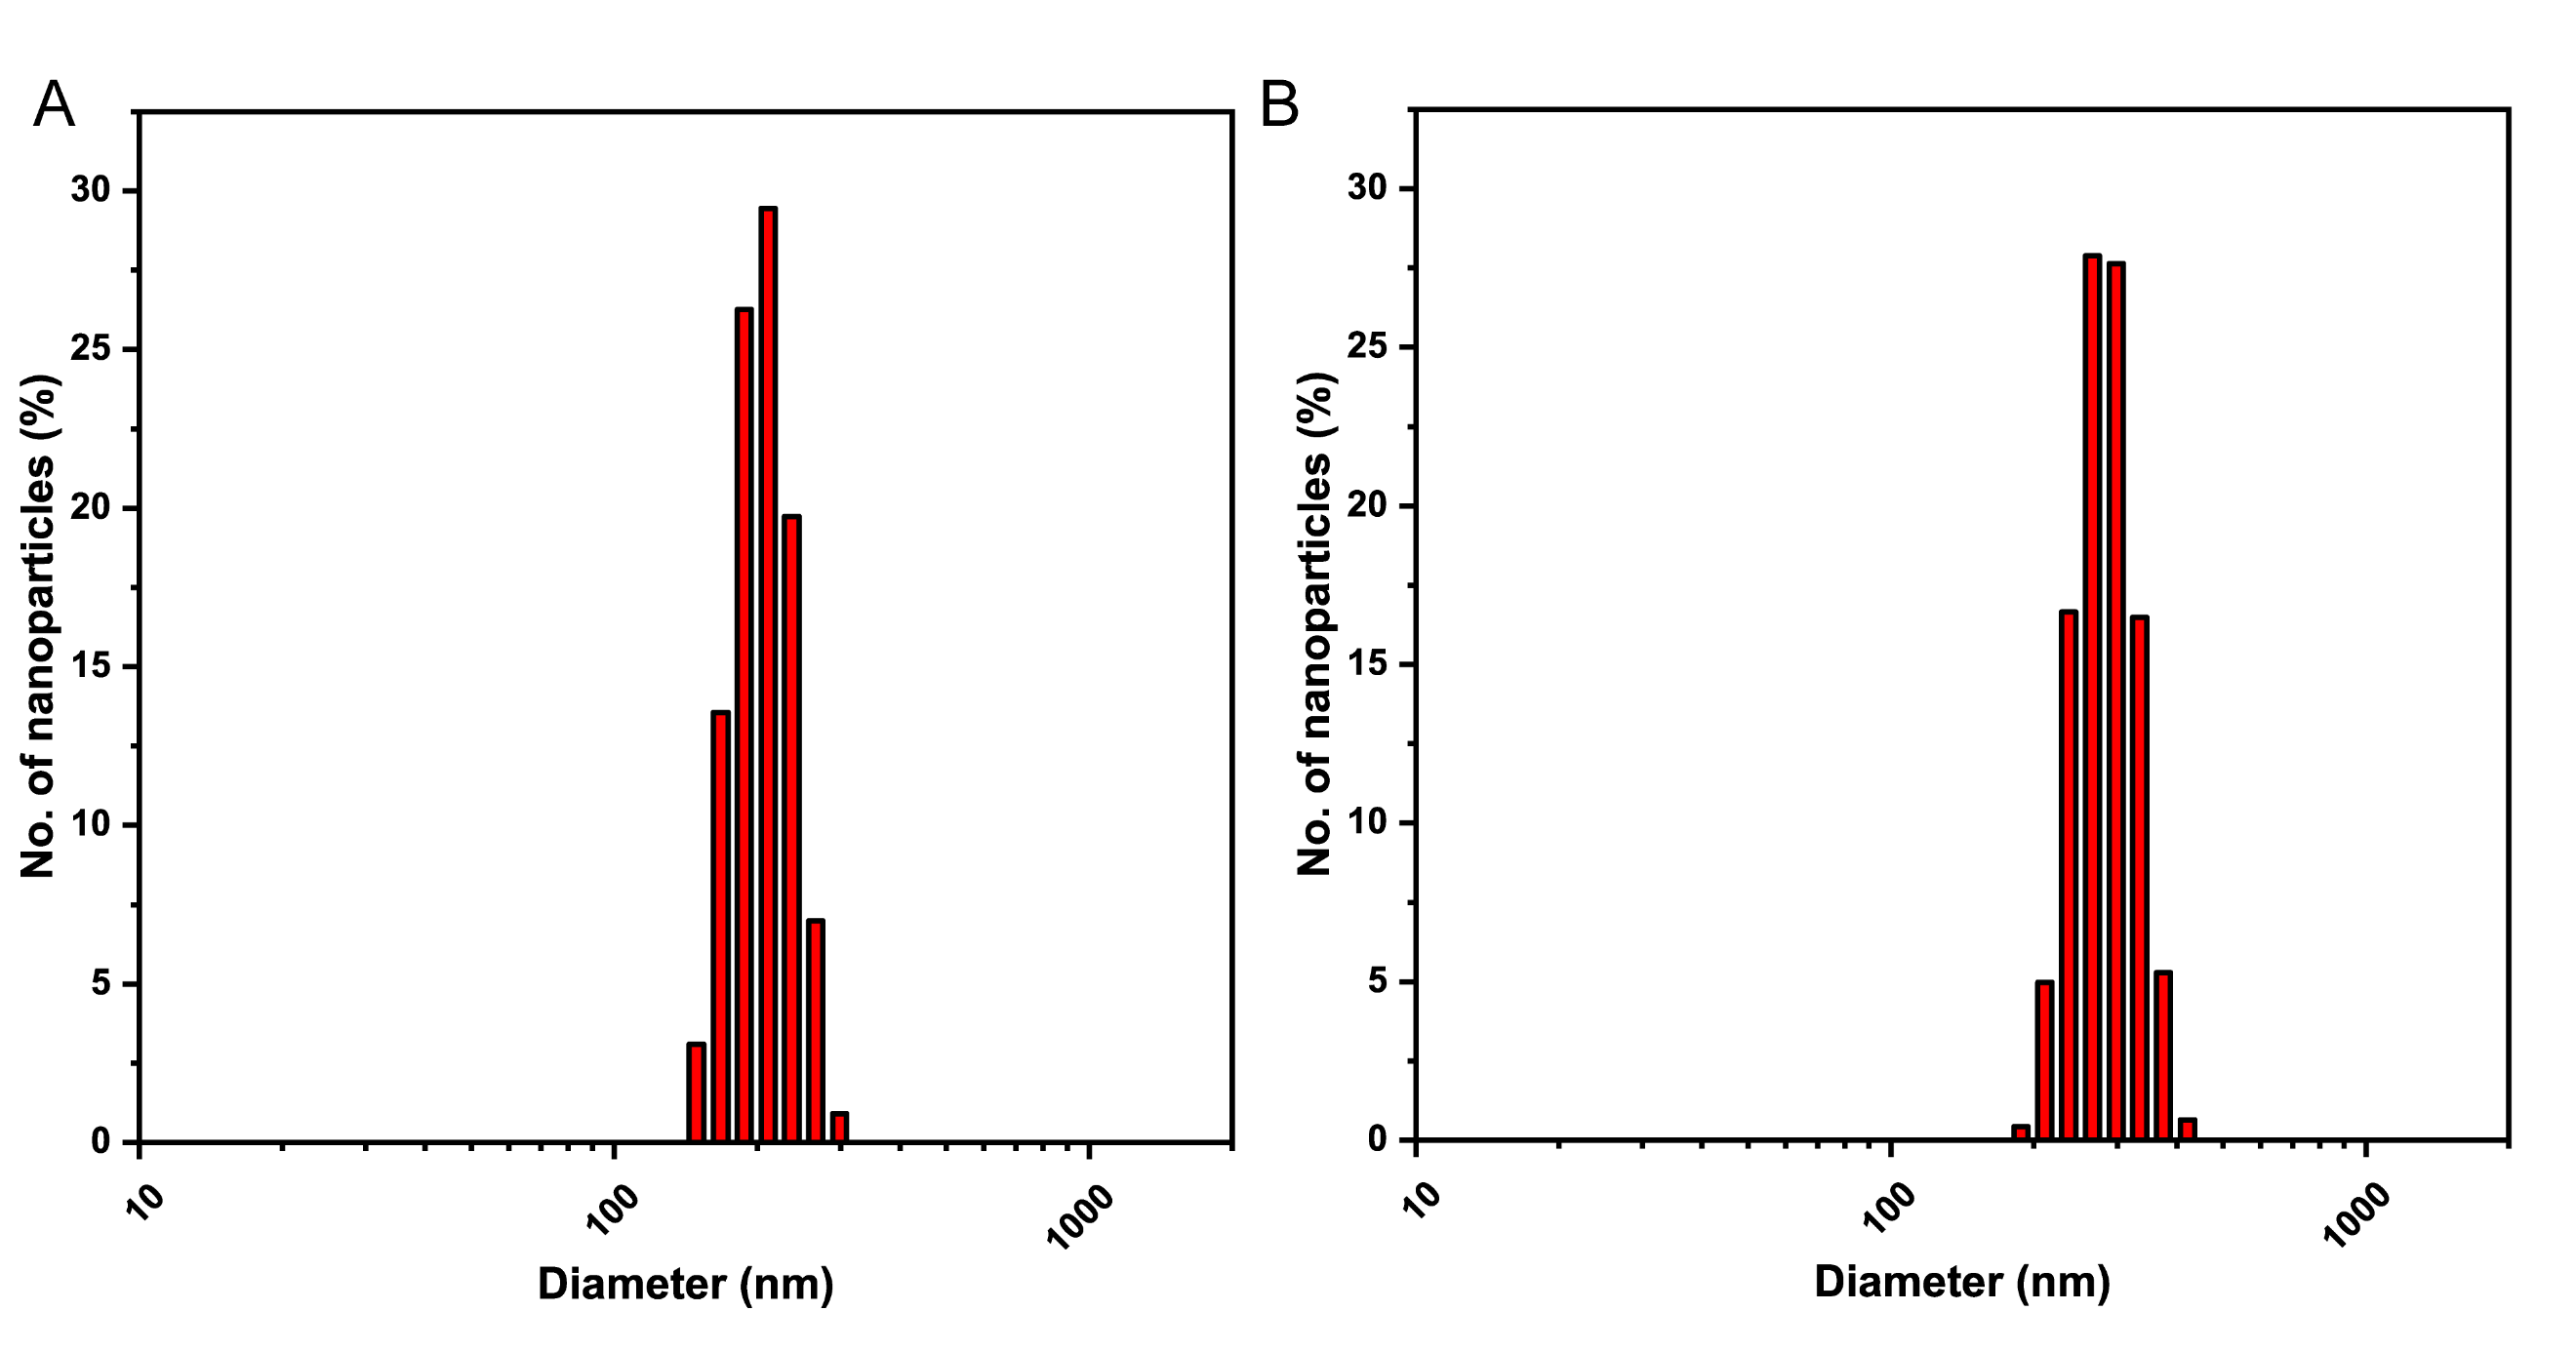


Figure S5. The dynamic light scattering (DLS) of CECMa (A) and after dissolved in PBS for 2 weeks(B).


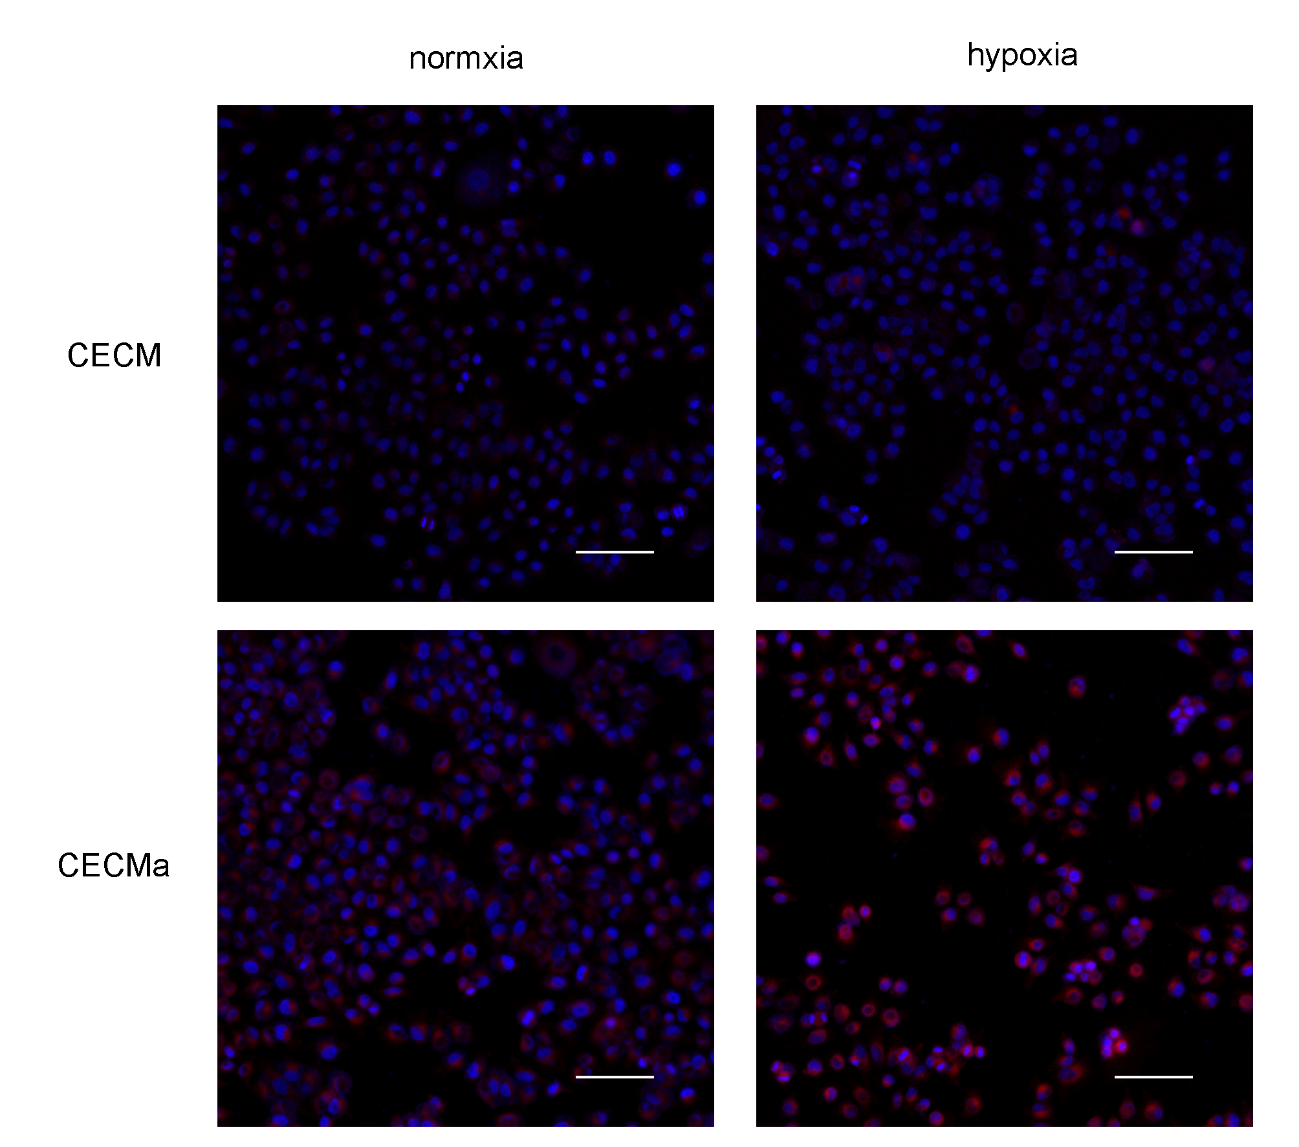


Figure S6. The Confocal fluorescence images of HSC3 cells incubated with CECM and CECMa under normoxia or hypoxia after 2 hours. Scale bar: 100μm.


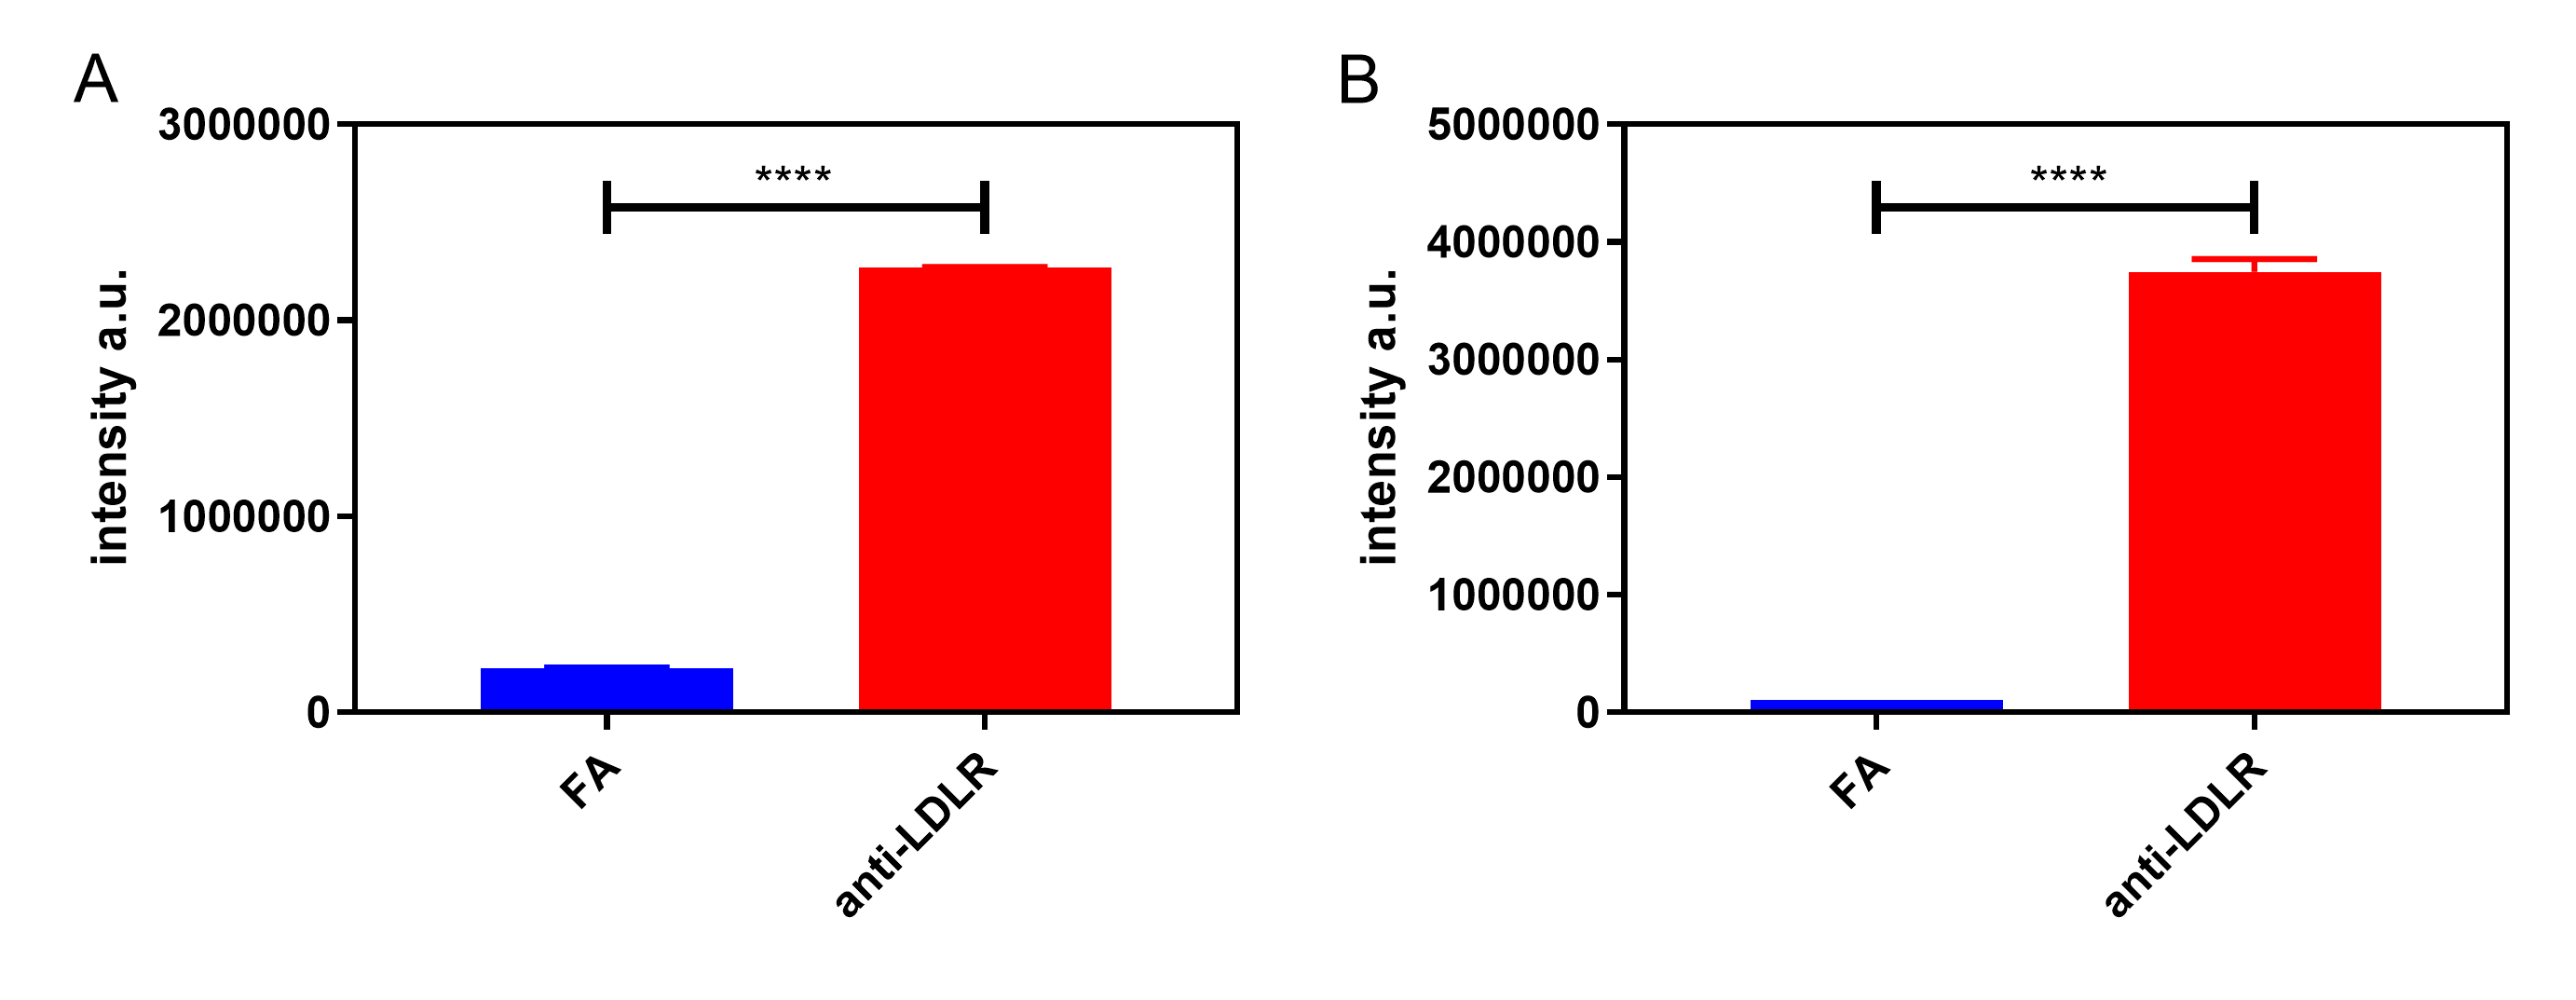


Figure S7. The quantification of CLSM images of (A) CAL27 and (B) SCC4 3D multicellular spheroids in Figure 4C. **** P < 0.0001.


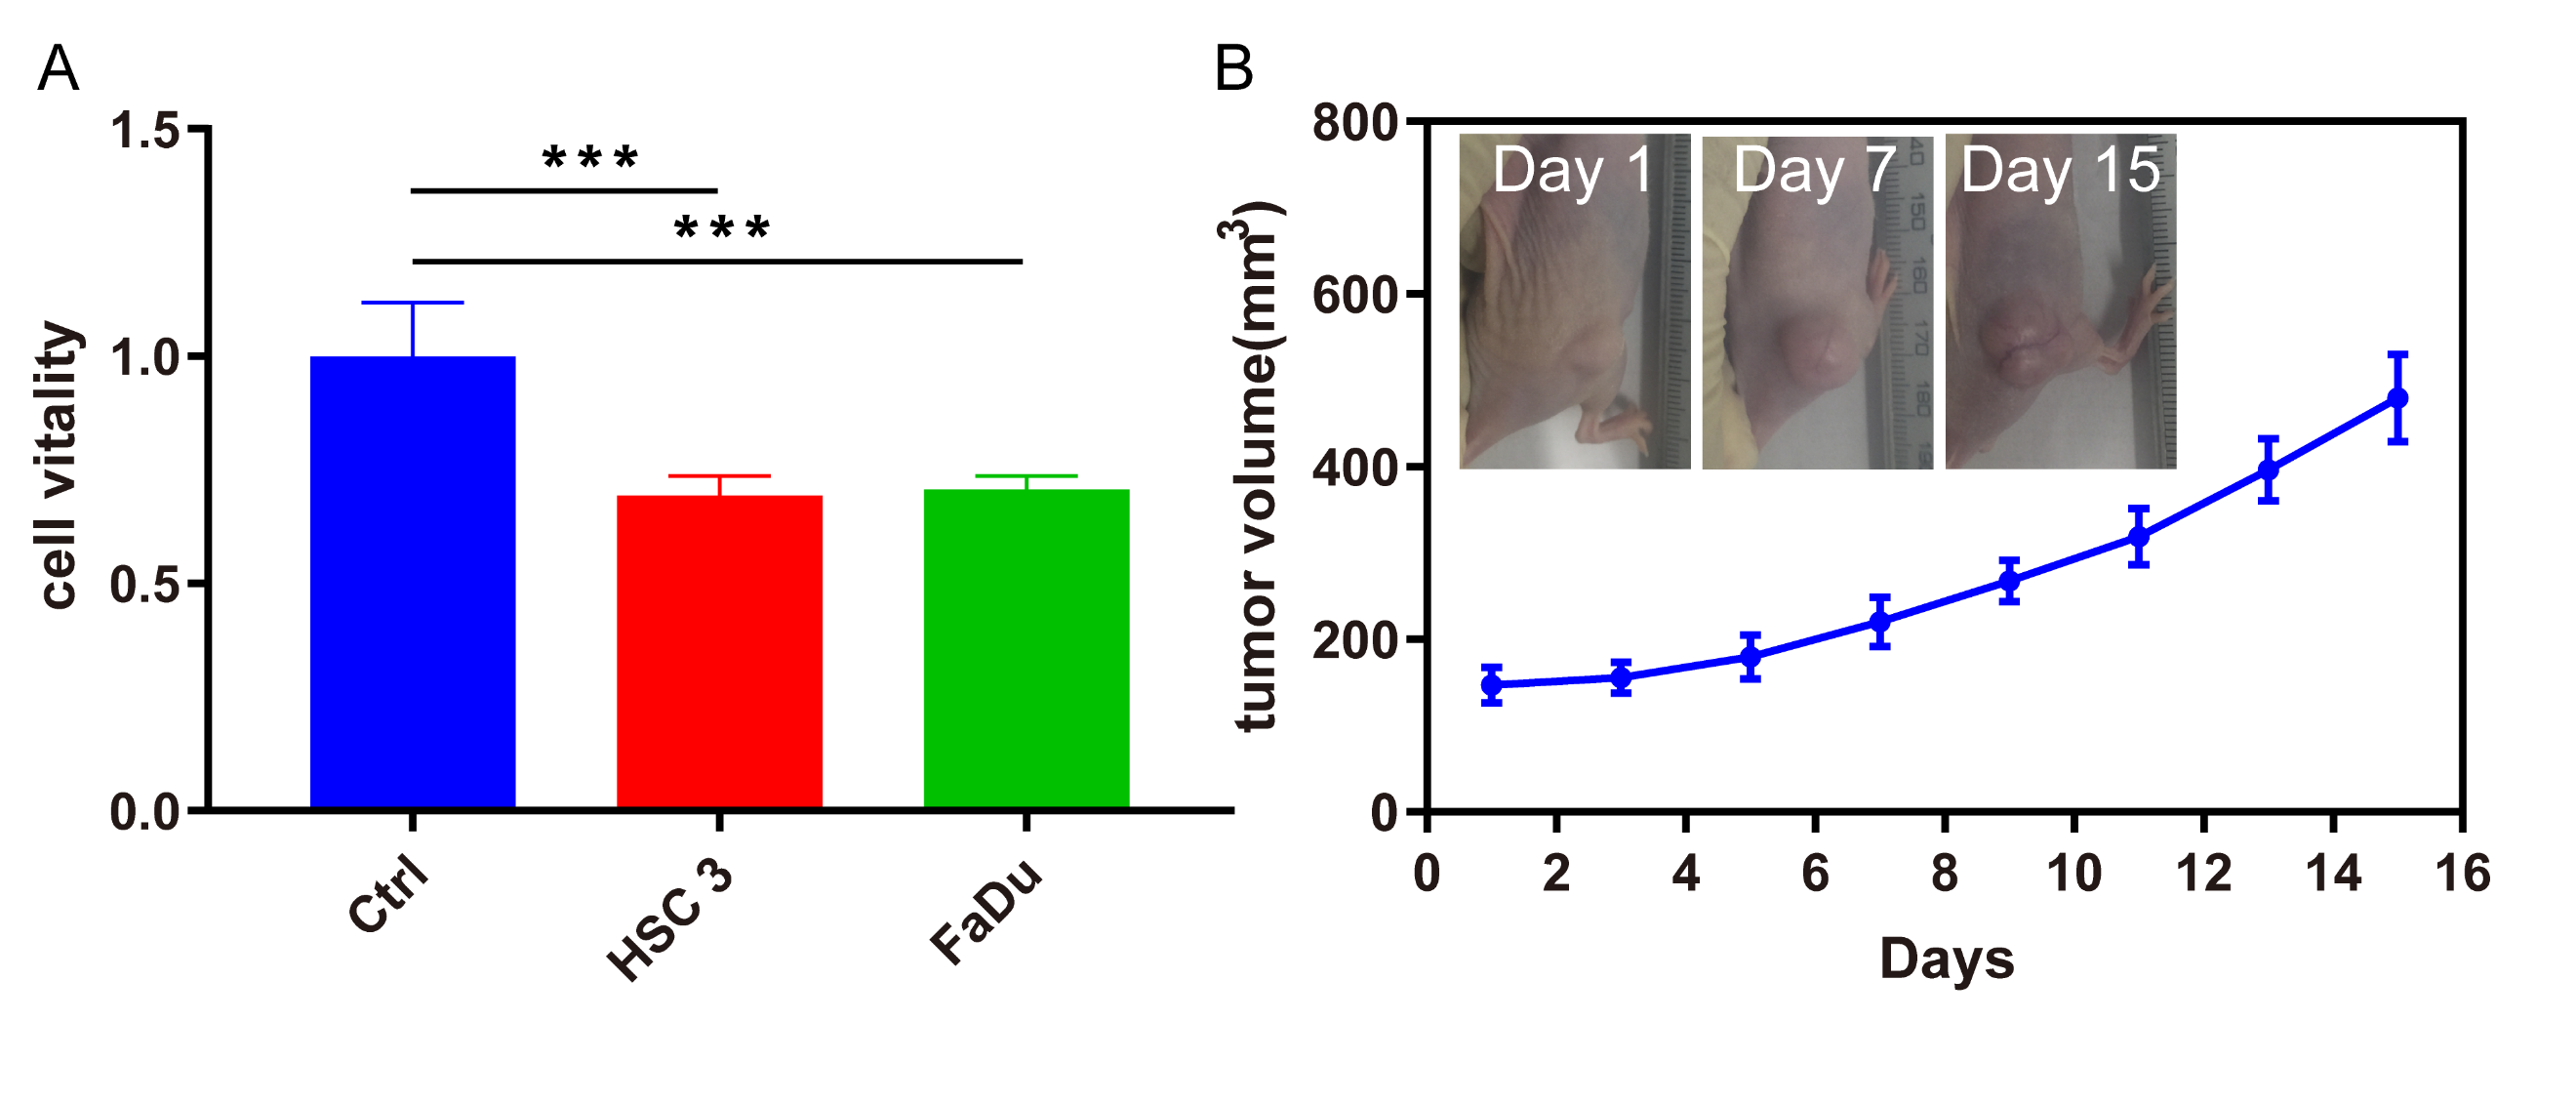


Figure S8. (A)The CCK-8 result of tumors treated with CE NPs + Laser. **** P < 0.001. (B) The tumor volume curve and the photo of the nanoparticle (no drug) + laser control. (n=4)
